# Supplementary material
Source: publisher site journal article supplement (https://www.dovepress.com/article/533590)
Supplement: Supplementary file 1 [file Supplementary File 2.pdf › Supplementary File 2.pdf]

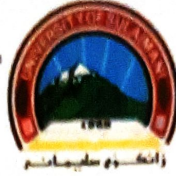

Number: 84  
Date : 12 / 05 / 2024

The Ethics Committee of the College of Medicine

We the members of the ethical committee approved the research project below in the

Meeting (No : 11 ) on the date ( 12 / 05 / 2024 ).

Title of the research project: Assessment of Selling Antibiotics without Prescriptions among Nurse-led Clinics in Sulaymaniyah: A Simulated Client Study

Names and tile of the participants:

1. Dr. Amanj Baker: Assistant Professor, 2. Dr. Awat Jamal Hasan: Lecture, 3. Ari Jamal Hassan: Assistant Lecture

Place of research study: Sulaiman City

Members of Ethical committee of the College of Medicine

Prof. Dr. Hiwa Asaad Abdul Kareem  
Head of the committee

Lecturer. Dr. Bahroz Abbas Mahmood  
Member

Ass.Prof.Dr.Anwer Aboubaker Kareem Ameen  
Member

Ass.Prof .Dr. Gulala Ibrahim Qader  
Member

Ass.Prof Dr. Rebwar Ghareeb Hama  
Member

Lecturer. Dr.Aram Jalal Abdullah  
Member

Lecturer.Dr. Bahar Nasrudeen Majeed  
Member
